# Supplementary material for: Fast and Accurate Resonance Assignment of Small-to-Large Proteins by Combining Automated and Manual Approaches
Source: PLoS Comput Biol. 2015 Jan 8;11(1):e1004022. doi: 10.1371/journal.pcbi.1004022 (PMC4288728; doi:10.1371/journal.pcbi.1004022)
Supplement: S2 Table — Isotope shift compensation for deuterated protein samples. Values used to compensate 13Cα, 13Cβ and 13CO chemical shifts are shown. (DOC) [file pcbi.1004022.s002.doc]

**Table S2. Isotope shift compensation1 for deuterated2 proteins.**

| **Residue** | **∆δ 13Cα (ppm)** | **∆δ 13Cβ (ppm)** | **∆δ 13CO (ppm)** |
| --- | --- | --- | --- |
| Ala | 0.45 (182) | 0.82 (18) | -0.03 (19) |
| Arg | 0.45 (3) | 0.98 (3) | -0.02 (3) |
| Asn | 0.28 (2) | 0.58 (2) | -0.02 (2) |
| Asp | 0.35 (2) | 0.61 (2) | -0.03 (2) |
| Cys | 0.62 (1) | 0.66 (1) | 0.02 (1) |
| Gln | 0.46 (5) | 0.85 (4) | -0.05 (5) |
| Glu | 0.47 (14) | 0.87 (14) | -0.03 (14) |
| Gly | 0.42 (6) | n.a. | -0.01 (6) |
| His | 0.42 (4) | 0.89 (4) | 0.03 (4) |
| Ile | 0.42 (3) | 0.94 (2) | -0.03 (2) |
| Leu | 0.42 (10) | 1.10 (11) | -0.04 (11) |
| Lys | 0.44 (9) | 1.02 (9) | -0.05 (9) |
| Met | 0.46 (2) | 0.86 (2) | -0.03 (2) |
| Phe | 0.35 (6) | 0.86 (6) | -0.01 (5) |
| Pro | 0.42 (3) | 0.85 (3) | -0.06 (6) |
| Ser | 0.36 (8) | 0.72 (6) | -0.01 (9) |
| Thr | 0.38 (2) | 0.55 (2) | -0.02 (2) |
| Trp | 0.34 (2) | 0.67 (2) | -0.03 (2) |
| Tyr | 0.40 (1) | 0.89 (1) | -0.05 (1) |
| Val | 0.46 (12) | 0.94 (12) | -0.04 (1) |

1Defined as the value added to the 13Cα, 13Cβ and 13CO chemical shifts of the analyzed spin system when calculating the *χ2*value for a given amino acid. 2The same compensation is applied for both perdeuterated and partially deuterated proteins. 3Number of chemical shifts used in the calculation. 3Number of chemical shifts used in the calculation.
